# Supplementary material
Source: ML conference proceedings conference paper supplement (https://aclanthology.org/D17-1281)
Supplement: Attachment [file appendix.pdf › supp/appendix.pdf]

# Speeding up Reinforcement Learning-based Information Extraction Training using Asynchronous Methods : APPENDIX

**Aditya Sharma**  
Indian Institute of Science  
Bangalore, India  
adisharma075@gmail.com

**Zarana Parekh\***  
DA-IICT  
Gandhinagar, India  
zaranaparekh17@gmail.com

**Partha Talukdar**  
Indian Institute of Science  
Bangalore, India  
ppt@iisc.ac.in

## 1 Experimental Setup

For RLIE-DQN and RLIE-A3C, all experiments were carried out on an 18 core Intel Xeon E5-2666 v3 (Haswell) CPU.

## 2 Hyperparameter Values

For RLIE-A3C, we set discount factor  $\gamma = 0.8$ , and the entropy related hyperparameters  $\beta_d$  and  $\beta_q$  to 0.05 and 0.01, respectively. The learning rates are sampled from LogUniform( $10^{-4}$ ,  $10^{-2}$ ). The global network is updated after every 500 steps.

## 3 RLIE-A3C: Psuedocode for each parallel agent

The pseudocode for each parallel agent of RLIE-A3C is described in Algorithm 1.

---

### Algorithm 1 Asynchronous advantage actor-critic - pseudocode for each parallel agent p

---

```

 $x \in \{d, q\}$ 
// Assume global shared parameter vectors  $\theta_x$  and  $\theta_v$  and
// global shared counter  $T = 0$ 
// Assume thread-specific parameter vectors  $\theta_x^p$  and  $\theta_v^p$  for
// parallel agent p
Initialize thread step counter  $t \leftarrow 1$ 
repeat
  Reset gradients:  $d\theta_x \leftarrow 0$  and  $d\theta_v \leftarrow 0$ .
  Synchronize thread-specific parameters  $\theta_x^p = \theta_x$  and
   $\theta_v^p = \theta_v$ 
   $t_{start} = t$ 
  Get state  $s_t$ 
  repeat
    Perform  $a_{dt}$  according to policy  $\pi_d(a_{dt}|s_t; \theta_d^p)$ 
    Perform  $a_{qt}$  according to policy  $\pi_q(a_{qt}|s_t; \theta_q^p)$ 
    Receive reward  $r_t$  and new state  $s_{t+1}$ 
     $t \leftarrow t + 1$ 
     $T \leftarrow T + 1$ 
  until terminal  $s_t$  or  $t - t_{start} == t_{max}$ 
   $R = \begin{cases} 0 & \text{for terminal } s_t \\ V(s_t, \theta_v^p) & \text{for non-terminal } s_t // \text{from last state} \end{cases}$ 
  for  $i \in \{t - 1, \dots, t_{start}\}$  do
     $G_t \leftarrow r_i + \gamma V(s_t, \theta_v^p)$ 
     $A(s_t, a_t; \theta_v) = \sum_{j=0}^{t_{max}-1} \gamma^j R_{t+j} + \gamma^{t_{max}} V(s_{t+t_{max}}; \theta_v) - V(s_t; \theta_v)$ 
    Accumulate gradients wrt  $\theta_x^p$ :  $d\theta_x^p \leftarrow$ 
     $d\theta_x^p + \nabla_{\theta_x^p} \log \pi_d(a_{x_i}, s; \theta_x^p) A(s_i, a_{x_i}; \theta_v^p) +$ 
     $\beta_x \nabla_{\theta_x^p} H(\pi_x(s_t; \theta_x^p))$ 
    Accumulate gradients wrt  $\theta_v^p \leftarrow d\theta_v^p + \partial(G_t -$ 
     $V(s_t; \theta_v^p))^2 / \partial \theta_v^p$ 
  end for
  Perform asynchronous update of  $\theta_d$  using  $d\theta_d^p$ , of  $\theta_q$ 
  using  $d\theta_q^p$  and of  $\theta_v$  using  $d\theta_v^p$ .
until  $T > T_{max}$ 

```

---

\*Research carried out during an internship at the Indian Institute of Science, Bangalore.
